# Supplementary material for: Preparation of high-performance supercapacitors from waste polyurethane-based hierarchical porous carbon
Source: Royal Society of Chemistry journal article supplement (doi:10.1039/d2nj04895g), 2022-01-01
Supplement: d2nj04895g1.pdf [file d2nj04895g1.pdf]

## Support information

### Preparation of High-performance Supercapacitors from Waste Polyurethane-based Hierarchical Porous Carbon

Weining Li<sup>a</sup>, Kunyin Wang<sup>a</sup>, Zhuo Li<sup>b</sup>, Chengyu Sun<sup>a</sup>, Shuyang Zhao<sup>a</sup>, Dequan  
Zhang<sup>a</sup>, Kun Chen<sup>\*a</sup>, Aijun Guo<sup>\*a</sup>

<sup>a</sup> *State Key Laboratory of Heavy Oil Processing, College of Chemical Engineering, China  
University of Petroleum (East China), 66 Changjiang West Road, Huangdao District, Qingdao,  
Shandong 266580, China.*

<sup>b</sup> *Key Laboratory of Bioinorganic and Synthetic Chemistry of Ministry of Education, School of  
Chemistry, SunYat-Sen University, Guangzhou 510275, China.*

\*Corresponding author:

Tel: 086-0532-8698-3050, e-mail address: [chenkun@upc.edu.cn](mailto:chenkun@upc.edu.cn) (K. Chen)

Tel: 086-0532-8698-0607, e-mail address: [ajguo@upc.edu.cn](mailto:ajguo@upc.edu.cn) (Aj. Guo)

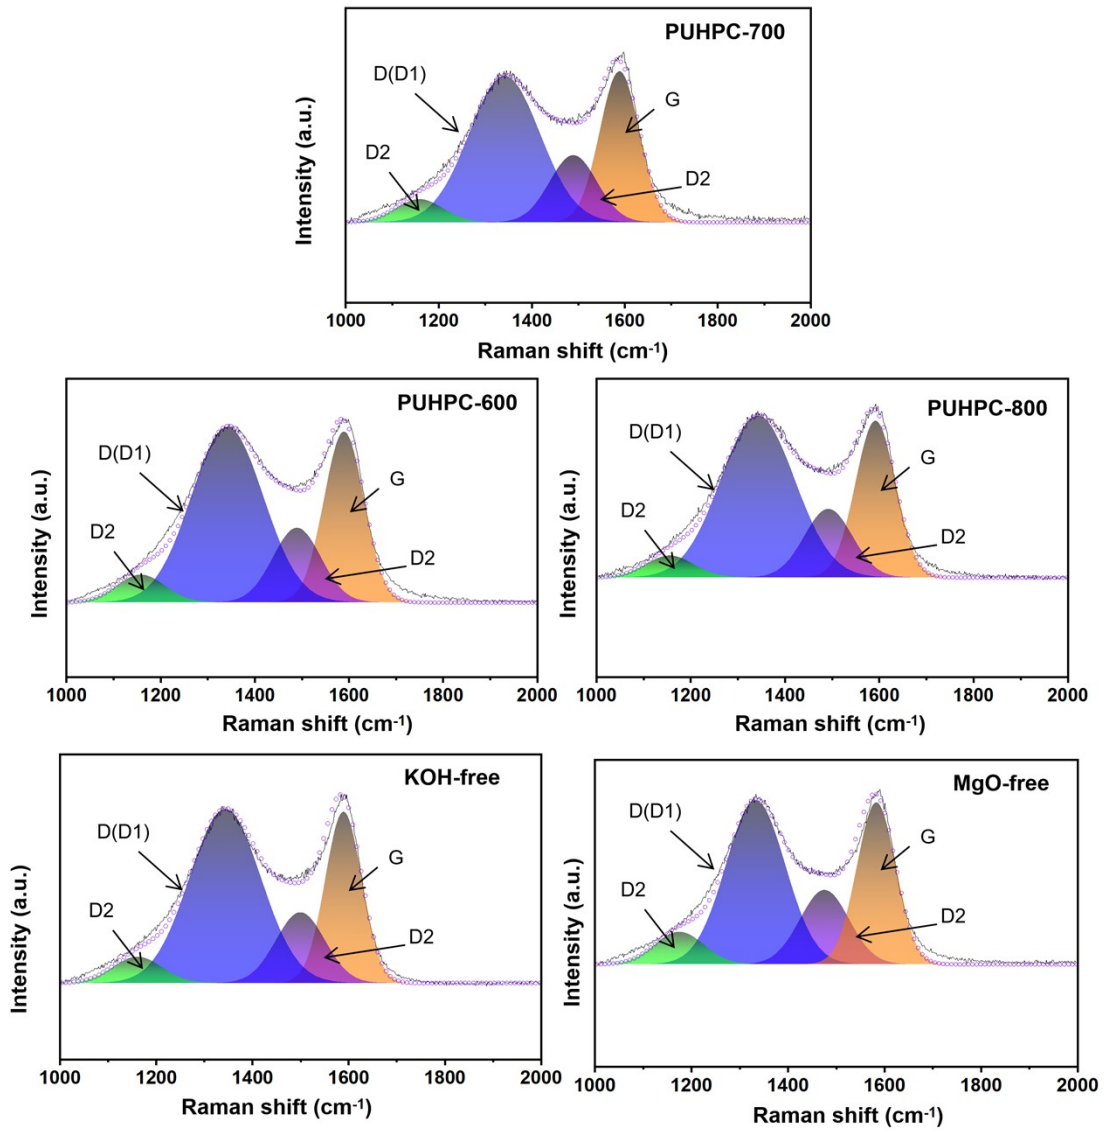

**Fig. S1** The Raman fitting result of sample

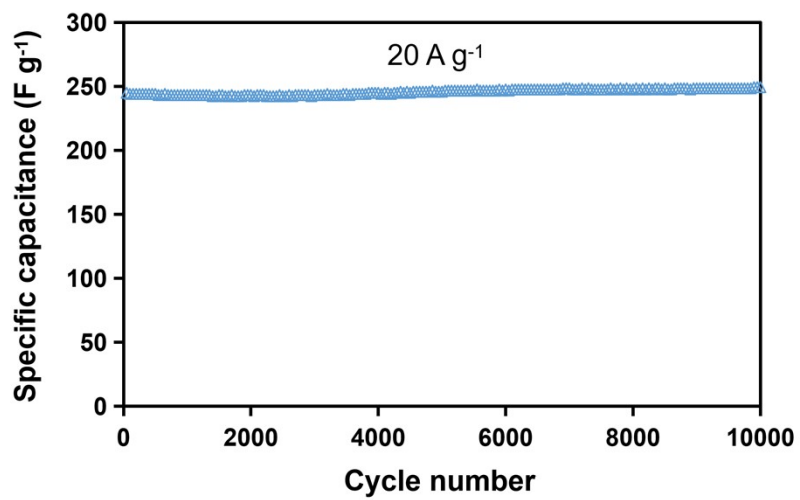

**Fig. S2** Cycling stability of PUHPC-700 at 20 A g<sup>-1</sup>

**Table S1** The detailed Raman fitting result of sample.

| Peak      | Peak area                                      |        | Ratio ((D <sub>1</sub> +D <sub>2</sub> +D <sub>3</sub> )/G) |
|-----------|------------------------------------------------|--------|-------------------------------------------------------------|
|           | D <sub>1</sub> +D <sub>2</sub> +D <sub>3</sub> | G      |                                                             |
| PUHPC-600 | 738838                                         | 300014 | 2.46                                                        |
| PUHPC-800 | 871845                                         | 335056 | 2.60                                                        |
| PUHPC-700 | 1874507                                        | 730023 | 2.57                                                        |
| KOH-free  | 1142676                                        | 480112 | 2.38                                                        |
| MgO-free  | 1174900                                        | 430052 | 2.49                                                        |
